# Supplementary material for: Targeting metabolism by B-raf inhibitors and diclofenac restrains the viability of BRAF-mutated thyroid carcinomas with Hif-1α-mediated glycolytic phenotype
Source: PubMed Central journal article supplement (PMC10338540; doi:10.1038/s41416-023-02282-2), 2023-05-17
Supplement: 41416_2023_2282_MOESM1_ESM.pdf [file 41416_2023_2282_MOESM1_ESM.pdf]

**Supplementary Figures, Figure Legends and title/legends for Supplementary files**

**A**

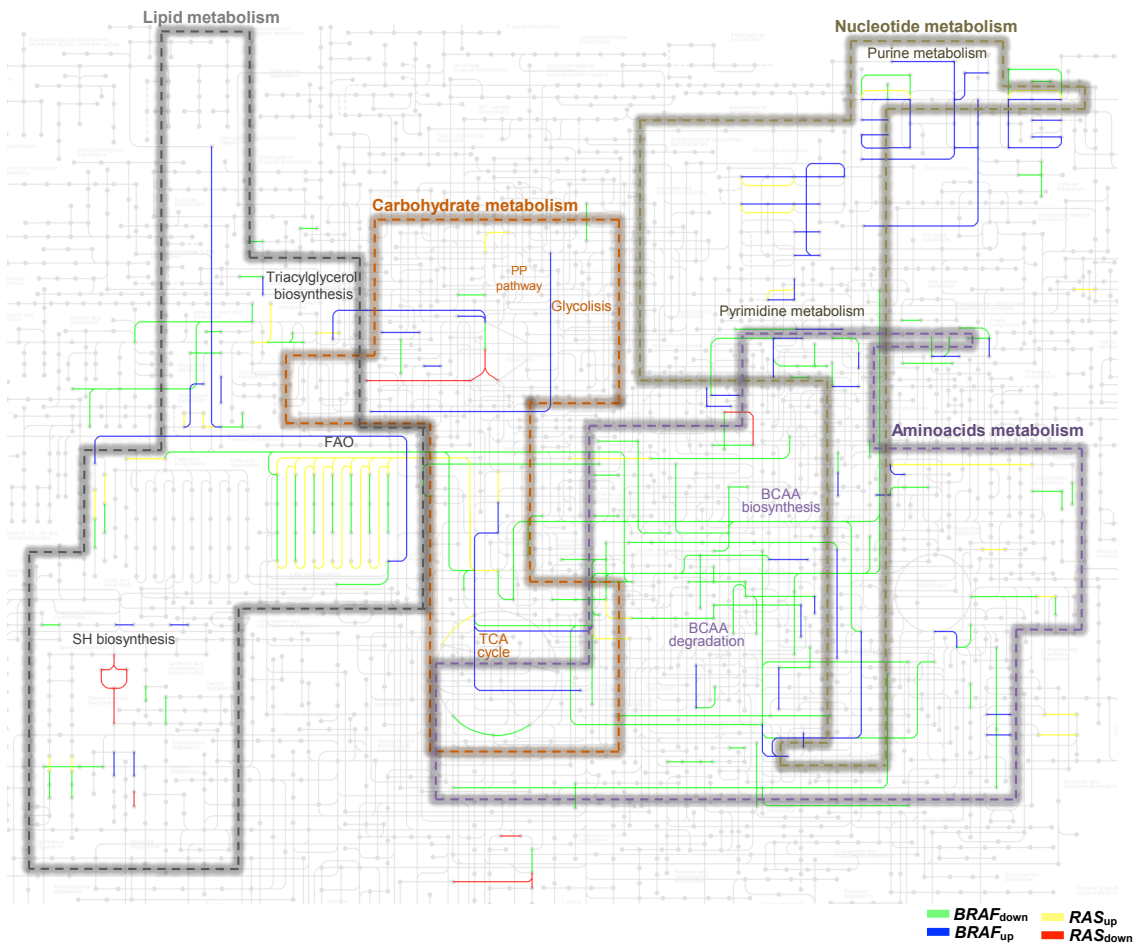

**B**

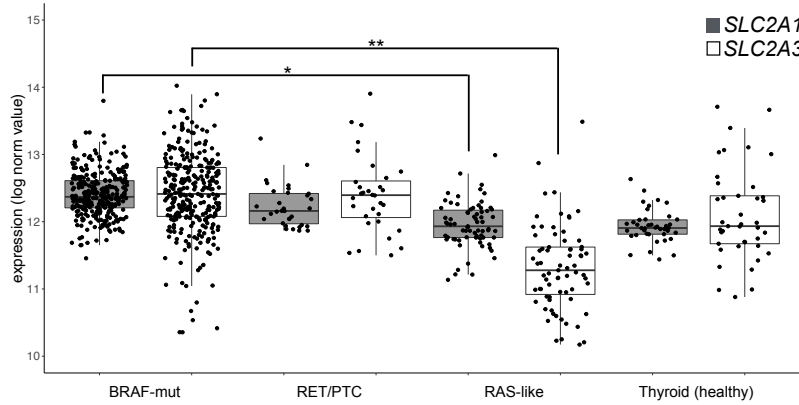

**C**

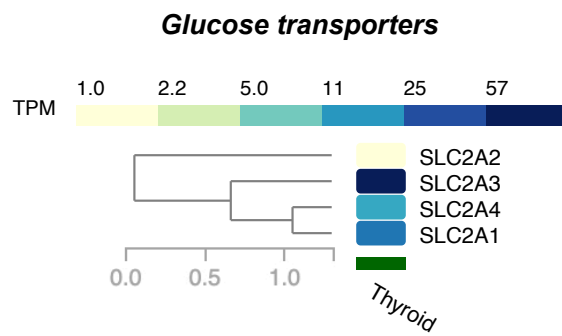

**Figure S1. Differential expression pattern of metabolic genes in PTCs subtypes. (A)** Graphical overview of metabolic pathways (KEGG database) enriched with genes differentially expressed between *BRAF*- and *RAS*-like PTCs in the THCA cohort. Metabolic pathways involved in lipid, carbohydrate, amino acids and nucleotide metabolism (dashed gray, orange, light purple and brown boxes, respectively) and including genes/complexes marked as *BRAF*<sub>up</sub> (blue), *BRAF*<sub>down</sub> (green), *RAS*<sub>up</sub> (yellow), *RAS*<sub>down</sub> (red). **(B)** Box plot displaying normalized expression values (log<sub>2</sub> scale) of *SLC2A1* and *SLC2A3* in distinct *BRAF*-like tumor subtypes (*BRAF*<sup>V600E</sup> and *RET/PTC*), *RAS*-like PTCs and healthy thyroids (THCA cohort). **(C)** Heat map reporting the expression data of GTEx database for glucose transporter encoding genes.

**A**

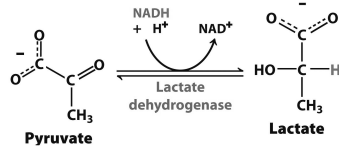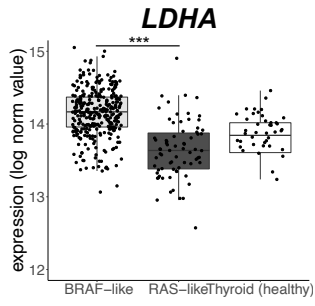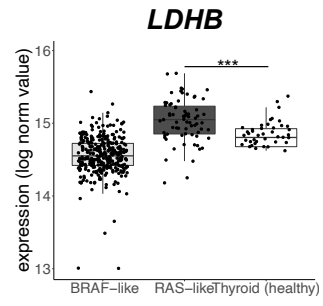

**B**

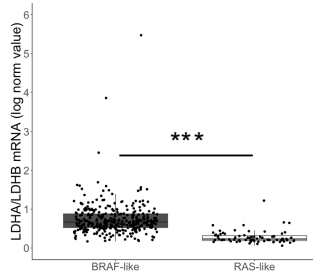

**C**

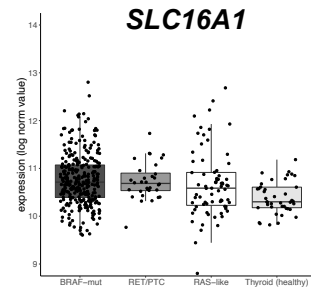

**D**

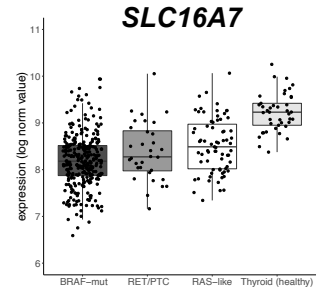

**Figure S2. Differential expression of genes involved in lactate metabolism in PTCs subtypes.** (A) Box plot showing normalized expression values ( $\log_2$  scale) of *LDHA* and *LDHB* in *BRAF*<sup>-</sup>, *RAS*-like PTCs and in healthy thyroids (THCA cohort), and schematic representation of the enzymatic reaction catalyzed by lactate dehydrogenase. \*\*\*FDR<0.001. (B) Ratio of *LDHA* and *LDHB* (*LDHA/LDHB*) normalized expression values ( $\log_2$  scale) in each tumor sample from *BRAF*<sup>-</sup> and *RAS*-like PTC subtypes. \*\*\*FDR<0.001. (C-D) Box plot displaying normalized expression values ( $\log_2$  scale) of *SLC16A1* (C) and *SLC16A7* (D) in *BRAF*<sup>-</sup>, *RAS*-like PTCs and in healthy thyroids (THCA cohort).

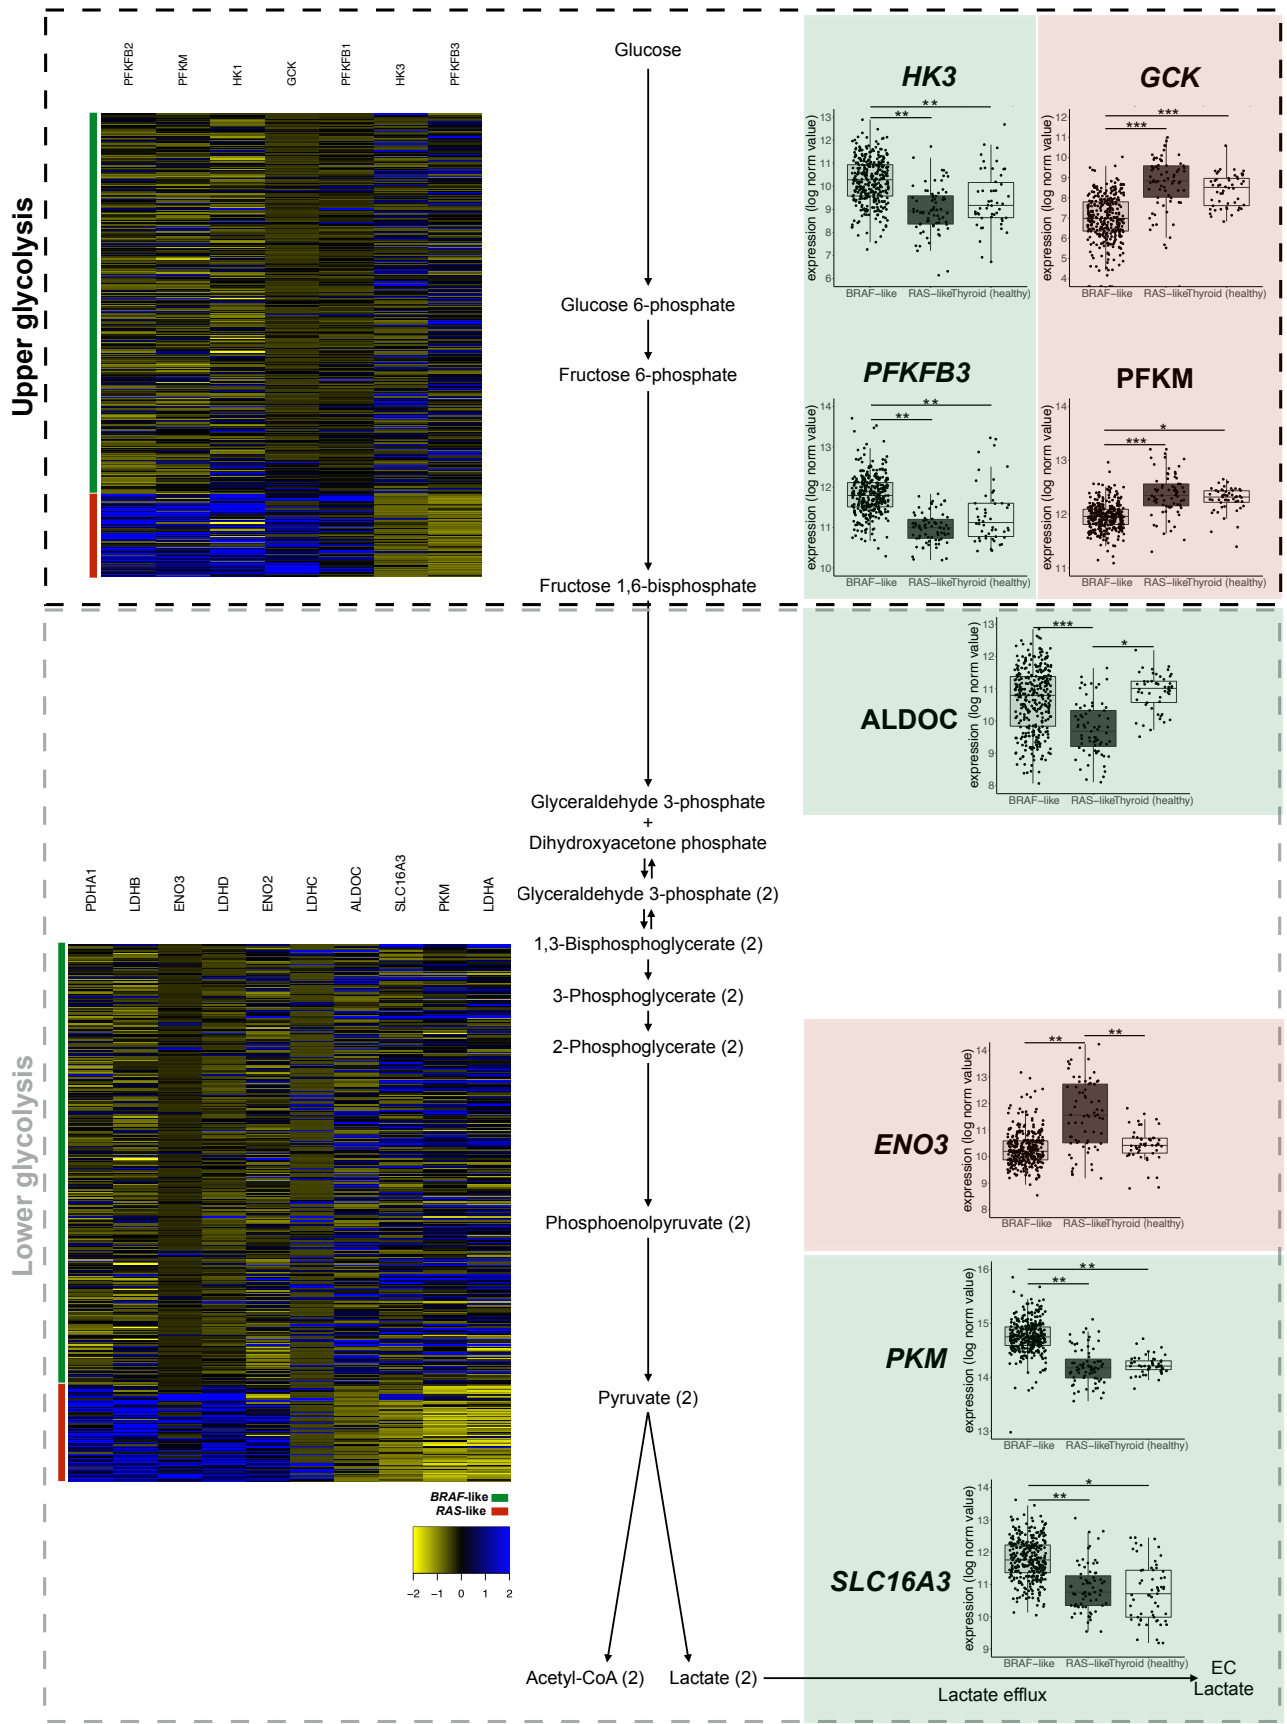

**Figure S3. Differential rewiring of genes within the glycolytic flux in *BRAF*- and *RAS*-like PTCs.** Upper and lower panels refer to the expression of genes encoding the enzymes involved in the upper and lower glycolysis, respectively, as displayed in the central scheme that recapitulates all the enzymatic reactions of the process. On the left, the heat maps showing normalized expression data of upper glycolysis genes in the *BRAF*- (green) vs *RAS*-like (red) PTCs. On the right, the box plots display expression values ( $\log_2$  scale) of genes marked as *BRAF*<sub>up</sub> or *RAS*<sub>down</sub> (highlighted by green boxes) and *BRAF*<sub>down</sub> (highlighted by red boxes). Genes defined as *RAS*<sub>up</sub> have not been detected in glycolytic flux. \*FDR $\leq$ 0.05, \*\*FDR $\leq$ 0.01, \*\*\*FDR $\leq$ 0.001.

**A**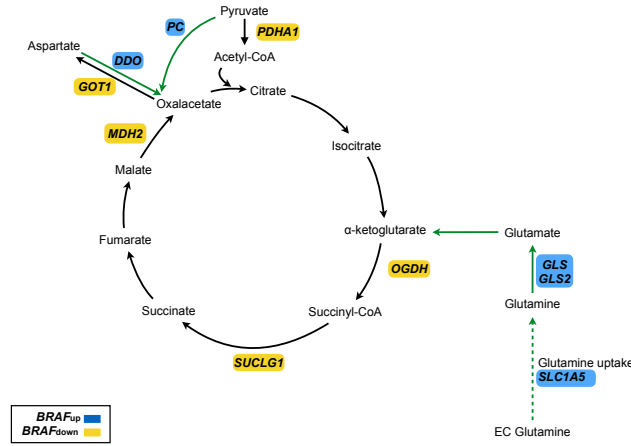**B**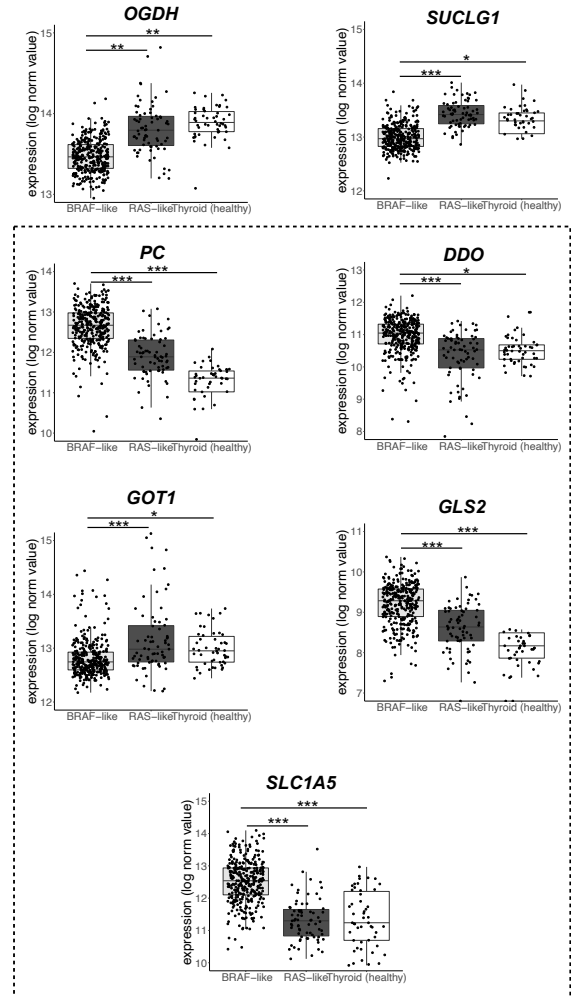**C**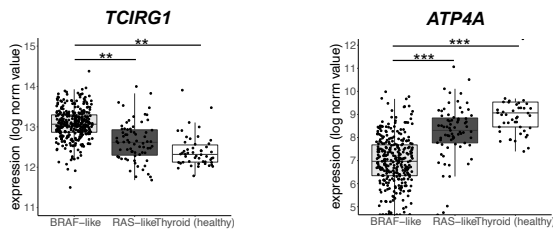**D**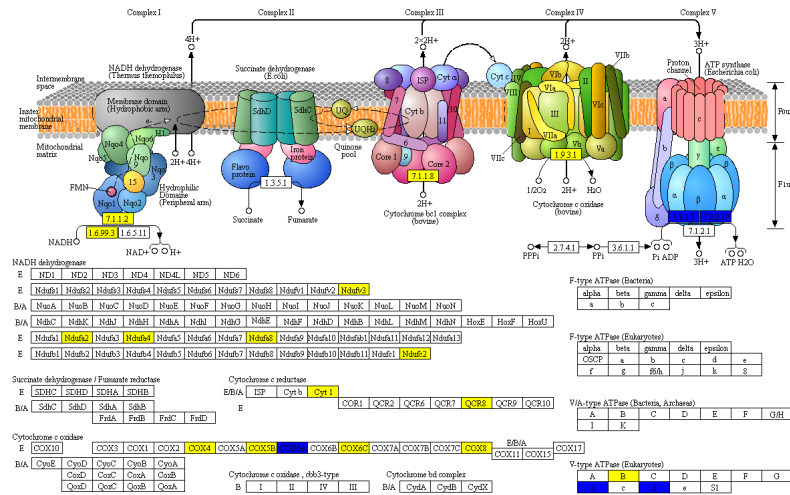**E**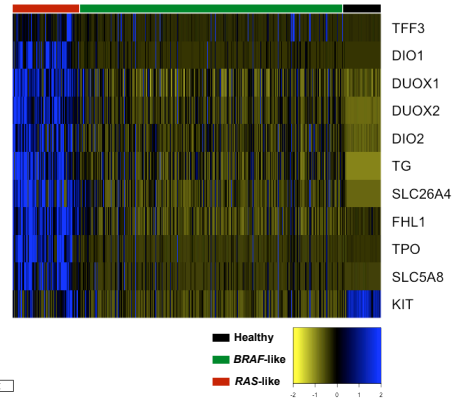



**Figure S4. Differential expression of metabolic genes involved in TCA, anaplerotic reactions and OXPHOS in PTCs subtypes. (A)** Schematic representation of TCA cycle and related anaplerotic (green arrows) and cataplerotic reactions. Genes differentially expressed in *BRAF*- vs *RAS*-like PTCs and marked as *BRAF*<sub>up</sub> and *BRAF*<sub>down</sub> are depicted in blue and yellow, respectively. **(B)** Box plots display the expression values (log<sub>2</sub> scale) of genes - highlighted in panel A - in *BRAF*-, *RAS*-like tumors and in healthy thyroid samples (THCA cohort). Genes encoding enzymes within the TCA cycle are shown in the upper part, whereas those responsible for the anaplerotic fluxes are reported in the dashed box below. \*FDR≤0.05, \*\*FDR≤0.01, \*\*\*FDR≤0.001. **(C)** Box plots display the expression values (log<sub>2</sub> scale) of *ATP4A* and *TCIRG1* genes – involved in OXPHOS – in *BRAF*-, *RAS*-like PTCs and in healthy thyroid samples (THCA cohort). \*\*FDR≤0.01, \*\*\*FDR≤0.001. **(D)** Graphical representation of ATP production via OXPHOS (KEGG pathway) showing differentially expressed genes (DEGs) overexpressed and downregulated in *BRAF*-like PTCs (highlighted in blue and in yellow, respectively). **(E)** Heatmap displaying normalized expression data of genes encoding markers of tumor aggressiveness in healthy thyroids (black), *BRAF*- (green) and *RAS*-like (red) PTCs (RNA-Seq from THCA; n=448).



**Figure S5. Differential expression of metabolic genes involved in amino acids biosynthesis and lipid metabolism in PTCs subtypes.** **(A)** Heat map showing normalized expression data (RNA-Seq from THCA; n=398) for *BRAF*- (green) and *RAS*-like (red) PTCs for metabolic genes involved in amino acids biosynthesis, according to KEGG database classification. **(B)** Graphical representation of valine, leucine, isoleucine degradation processes, enriched with genes differentially expressed between *BRAF*- and *RAS*-like PTCs and vs healthy thyroids (THCA cohort). Genes/complexes identified as *BRAF*<sub>up</sub> and *BRAF*<sub>down</sub> are highlighted in blue and green, respectively. **(C)** Heat map showing normalized expression data (RNA-Seq from THCA; n=398) for *BRAF*- (green) and *RAS*-like (red) PTCs for metabolic genes involved in lipid metabolism, according to KEGG database classification. **(D)** Graphical representation of fatty acid degradation pathway, enriched of genes differentially expressed between *BRAF*- and *RAS*-like PTCs and vs healthy thyroids (THCA cohort). Genes/complexes identified as *BRAF*<sub>up</sub>, *BRAF*<sub>down</sub> and *RAS*<sub>up</sub> are highlighted in blue, green and yellow, respectively.

A

### Purine and Pyrimidine metabolism

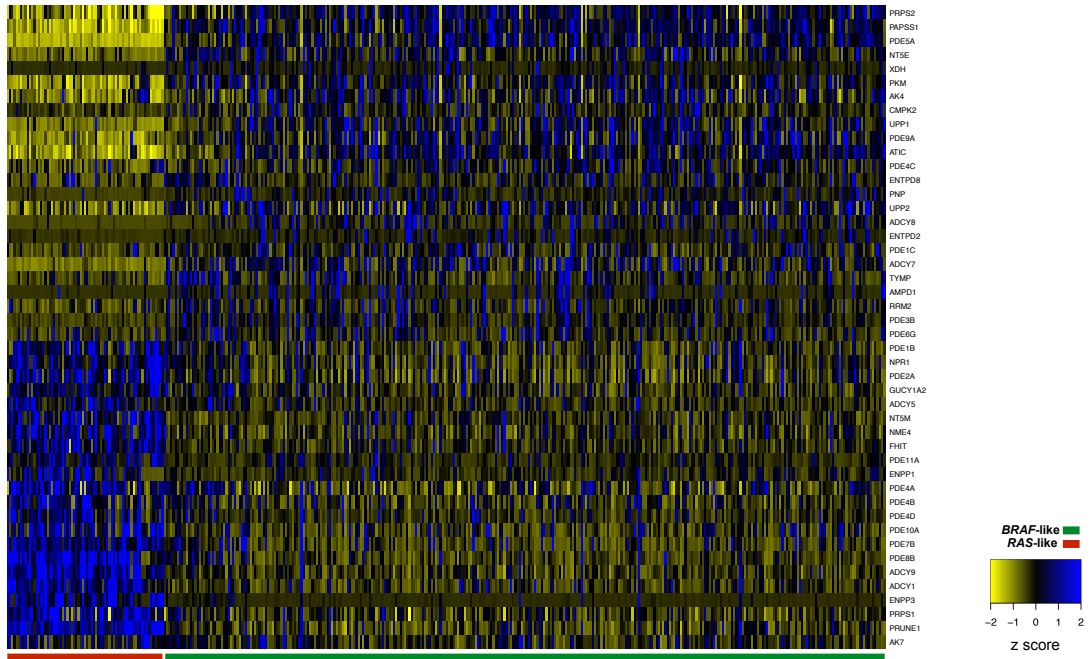

B

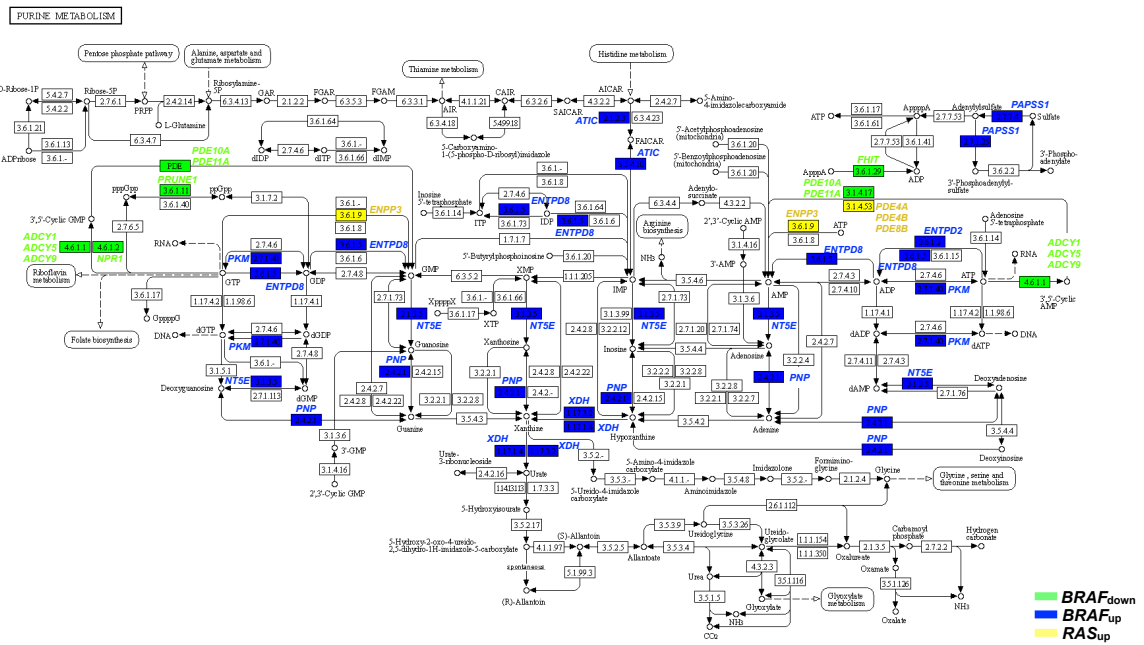

**Figure S6. Differential expression of metabolic genes involved in purine and pyrimidine metabolism in PTCs subtypes. (A)** Heat map showing normalized expression data (RNA-Seq from THCA; n=398) for *BRAF*- (green) and *RAS*-like (red) PTCs for metabolic genes involved in purine and pyrimidine metabolism, according to KEGG database classification. **(B)** Graphical representation of purine metabolism, enriched with genes differentially expressed between *BRAF*- and *RAS*-like PTCs and vs healthy thyroids (THCA cohort). Genes/complexes identified as *BRAF*<sub>up</sub>, *BRAF*<sub>down</sub> and *RAS*<sub>up</sub> are highlighted in blue, green and yellow, respectively.

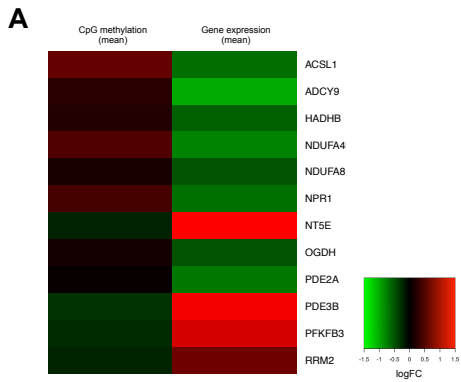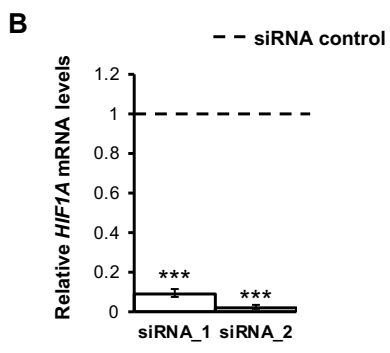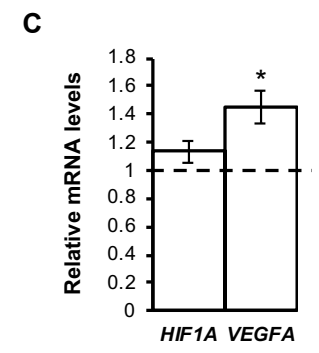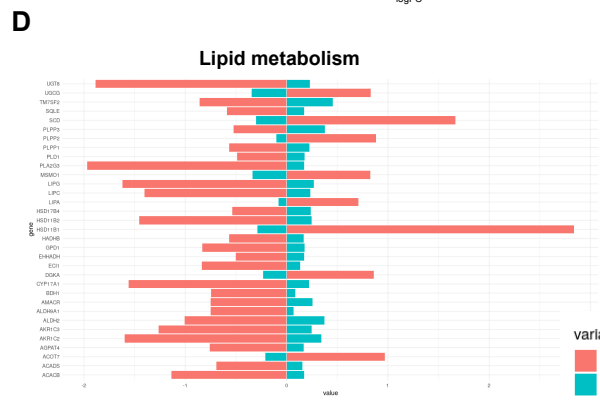

**Figure S7. DNA methylation and expression correlation in metabolic genes, *HIF1A* silencing/stabilization efficacy and metabolic effects of vemurafenib. (A)** Heat map showing mean expression and methylation values (logFC) for genes within clusters of genes hypermethylated and downregulated or hypomethylated and overexpressed in *BRAF*-like tumors. **(B)** Relative mRNA quantification (qPCR) of *HIF1A* expression in BCPAP transfected with two different *HIF1A* siRNAs. Data are reported as mean  $\pm$ SEM vs control cells (i.e., transfected with scrambled siRNAs; dotted line) of at least three independent experiments. *PPIA* was used as reference. \*\*\*p val  $\leq$  0.001. **(C)** Relative mRNA quantification (qPCR) of *HIF1A* and *VEGFA* (whose over-expression has been assessed as control of CoCl<sub>2</sub>-induced Hif-1 $\alpha$  activation) in BCPAP treated with CoCl<sub>2</sub> (250  $\mu$ M, 24h). Data are reported as mean  $\pm$ SEM vs control cells (i.e., BCPAP treated with the vehicle; dotted line) of at least four independent experiments. *PPIA* was used as reference. \*p val  $\leq$  0.05. **(D-G)** Bar graphs indicate the expression levels (logFC) of genes involved in lipid (D), pyrimidine (E), purine (F) and amino acids (G) metabolism and differentially expressed between *BRAF*- and *RAS*-like tumors, whose expression is reverted upon treatment with vemurafenib (blue bars) in multiple *BRAF*-mutated tumor cell lines from the LINCS 1000 Project. TCGA data (THCA cohort) for the same genes are indicated as red bars (logFC).

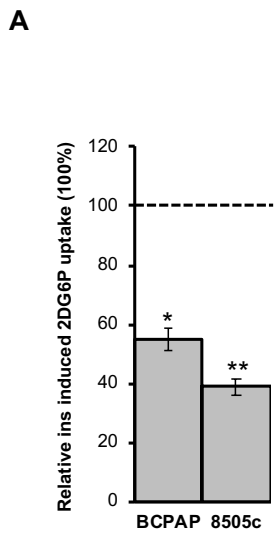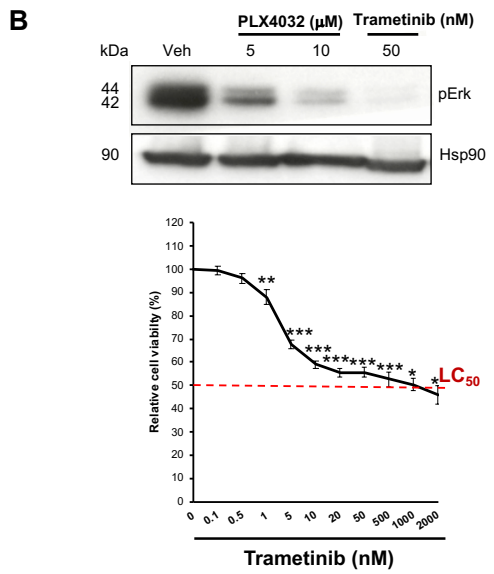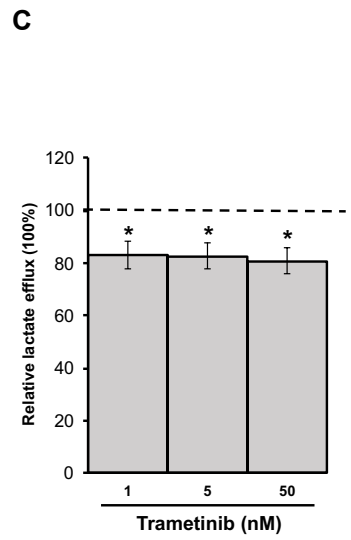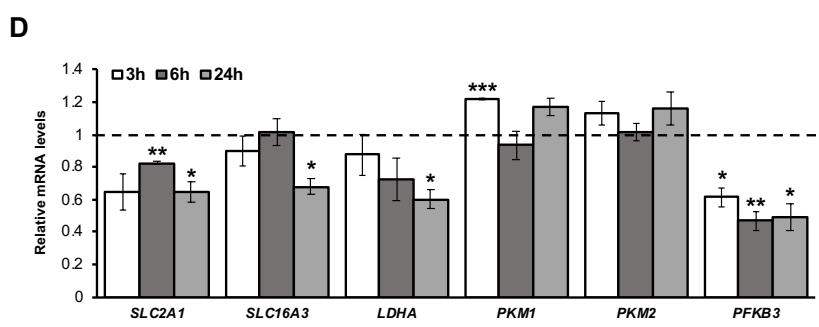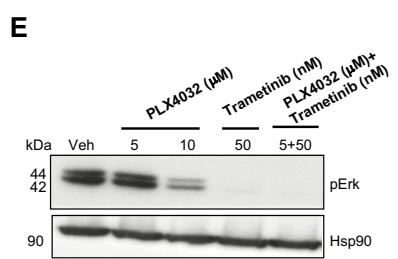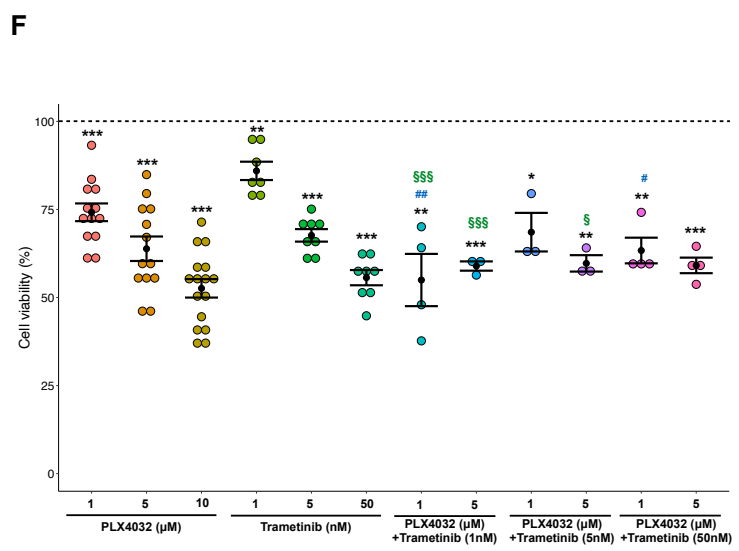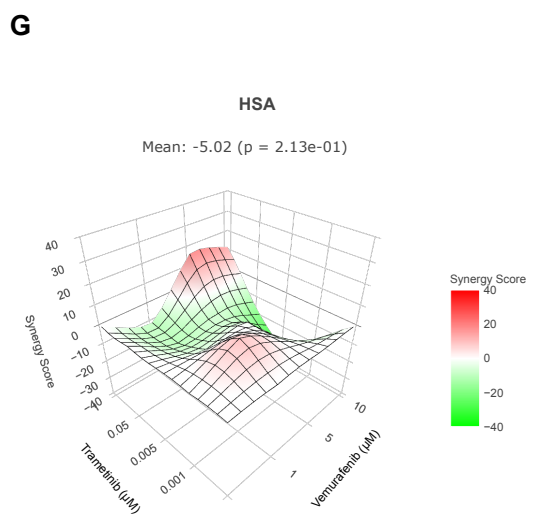



**Figure S8. Trametinib modulates the expression of metabolic phenotype but does not synergize with Braf inhibitor.** **(A)** Relative colorimetric detection of insulin-induced 2-DG6P uptake in BCPAP and 8505c treated with PLX4032 (5  $\mu$ M and 10  $\mu$ M, respectively) for 72h. The effect of PLX4032 treatment on insulin response was estimated as the difference between insulin-stimulated and insulin-free cells, then compared to the insulin-induced glucose uptake of control cells (i.e., cells treated with the vehicle, set to 100%; dotted line). Data are reported as mean  $\pm$ SEM of three independent experiments. \*p val  $\leq$  0.05, \*\*p val  $\leq$  0.01. **(B)** Representative autoradiographs of Western blot analysis of pErk (upper panel) protein levels in 8505c treated or not with PLX4032 (5 and 10  $\mu$ M) or Trametinib (50 nM) for 30 minutes. Hsp90 was used as a loading control. Relative cell viability (percentage; lower panel) in 8505c cells upon treatment with different concentrations of Trametinib (nM) for 72 hours. Red dotted line indicates the median lethal concentration (lethal concentration 50%, LC50). Data are reported as mean  $\pm$ SEM vs control cells (i.e., 8505c treated with Veh; set to 100% of viability) in three independent experiments. \*p val  $\leq$  0.05; \*\*p val  $\leq$  0.01 and \*\*\*p val  $\leq$  0.001. **(C)** Relative colorimetric detection of L-lactic acid content in cell culture supernatant of 8505c treated with Trametinib (1, 5 and 50 nM) for 72 hours. Lactate concentration (mmol/L) was normalized for the related AUC and data are reported as mean  $\pm$ SEM of at least four independent experiments. The effect of each treatment was estimated as the percentage of lactate secreted by control cells (i.e., 8505c treated with the vehicle, set to 100%; dotted line). \*p val  $\leq$  0.05. **(D)** Relative mRNA quantification (qPCR) of selected metabolic genes in 8505c treated with Trametinib (50 nM) for 3, 6 and 24 hours. Data are reported as mean  $\pm$ SEM vs control cells (i.e., treated with the vehicle; dotted line) of three independent experiments. *PPIA* was used as reference gene. \*p val  $\leq$  0.05, \*\*p val  $\leq$  0.01 and \*\*\*p val  $\leq$  0.001. **(E)** Representative autoradiographs of Western blot analysis of pErk protein levels in 8505c treated or not with PLX4032 (5 and 10  $\mu$ M), Trametinib (50 nM) or PLX4032 and Trametinib (5 $\mu$ M and 50nM, respectively) combination for 30 minutes. Hsp90 was used as a loading control. **(F)** Relative cell viability in 8505c cells upon single (PLX4032 and Trametinib) and combined treatment with the two drugs at different doses for 72 hours. Data are reported as mean  $\pm$ SEM vs control cells (i.e., 8505c treated with the vehicles - indicated as dotted line - are set to 100% of viability) of at least three independent experiments. \*p val  $\leq$  0.05, \*\*p val  $\leq$  0.01 and \*\*\*p val  $\leq$  0.001 vs control cells. #p val  $\leq$  0.05 and ##p val  $\leq$  0.01 vs 8505c treated with PLX4032 alone. §p val  $\leq$  0.05 and §§§p val  $\leq$  0.001 vs 8505c treated with Trametinib alone. **(G)** Heat map showing in 3D the HSA synergy scores (i.e., positive values in red denote synergy), analyzed by SynergyFinder tool, for the combination of Trametinib and PLX4032 in 8505c.

**A**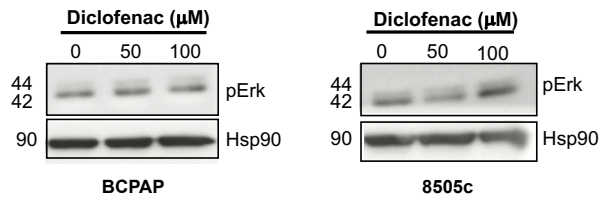**B**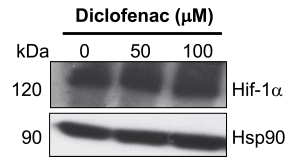**C**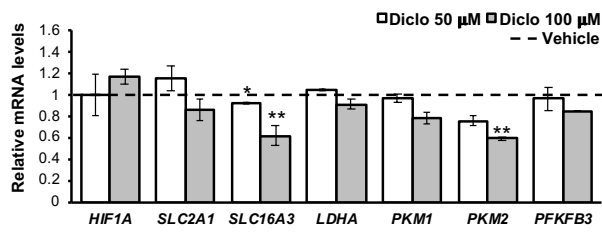**D**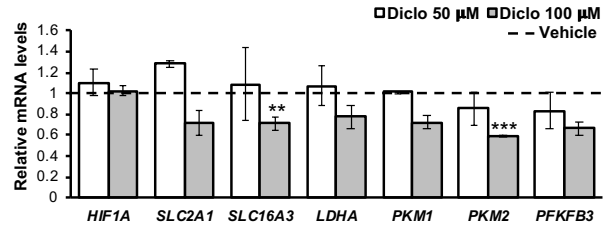**E**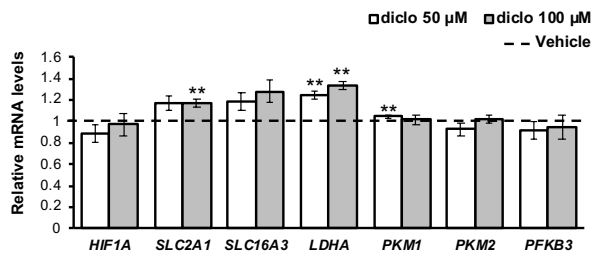**F**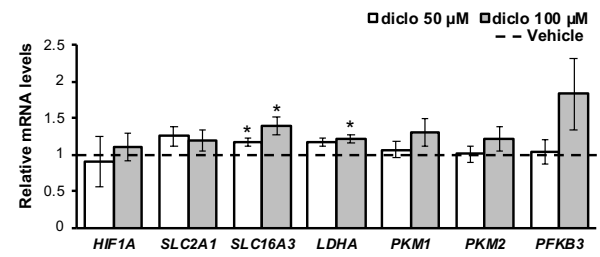**G**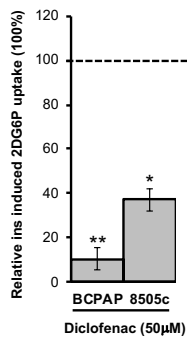**H**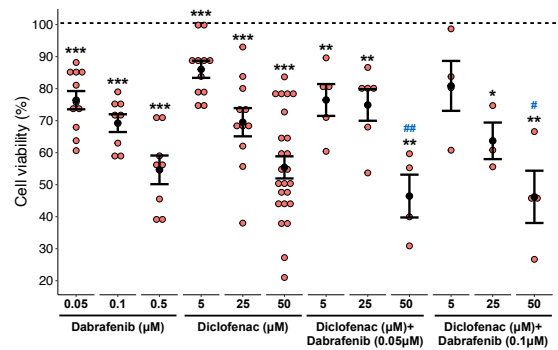

**Figure S9. Diclofenac reduces the insulin-stimulated glucose uptake, but does not affect Hif-1 $\alpha$  and glycolysis-related genes in *BRAF*-mutated PTC and ATC cells. (A)** Representative autoradiographs of Western blot analysis of pErk protein levels in BCPAP (left panel) and 8505c (right panel) treated or not with Diclofenac (50 and 100  $\mu$ M) for 24 hours. Hsp90 was used as a loading control. **(B)** Representative autoradiographs of Western blot analysis of Hif-1 $\alpha$  protein levels in BCPAP treated with diclofenac (50  $\mu$ M and 100  $\mu$ M; 24h). Hsp90 was used as a loading control. **(C-F)** Relative mRNA quantification (qPCR) of selected metabolic genes in BCPAP (C, D) and 8505c (E, F) treated with diclofenac (50  $\mu$ M and 100  $\mu$ M) for 3h (C, E) and 6h (D, F). Data are reported as mean  $\pm$ SEM vs control cells (i.e., cells treated with the vehicle; dotted lines) of at least three independent experiments. *PPIA* was used as reference gene. \*p val  $\leq$  0.05, \*\*p val  $\leq$  0.01 and \*\*\*p val  $\leq$  0.001. **(G)** Relative colorimetric detection of insulin-induced 2- DG6P uptake in BCPAP and 8505c treated with diclofenac (50  $\mu$ M) for 72h. The effect of diclofenac treatment on insulin response was estimated as the difference between insulin stimulated and insulin-free cells, then compared to the insulin-induced glucose uptake of control cells (i.e., cells treated with the vehicle, set to 100%; dotted line). Data are reported as mean  $\pm$ SEM of three independent experiments. \*p val  $\leq$  0.05 and \*\*p val  $\leq$  0.01. **(H)** Relative cell viability in BCPAP cells upon single (dabrafenib and diclofenac) and combined treatment with the two drugs at different doses for 72 hours. Data are reported as mean  $\pm$ SEM vs control cells (i.e., BCPAP treated with the vehicles - indicated as dotted line - are set to 100% of viability) of at least three independent experiments. \*p val  $\leq$  0.05, \*\*p val  $\leq$  0.01 and \*\*\*p val  $\leq$  0.001 vs control cells. #p val  $\leq$  0.05, ##p val  $\leq$  0.01 vs BCPAP treated with dabrafenib alone.

**Supplementary File 1. Classification of metabolism-related genes.**

Genes (official symbols; column A), are classified (in multiple sheets) according to the specific metabolic pathway they belong to (based on KEGG classification) and grouped based on their (exclusive or not) expression in BRAF- and/or RAS-like tumors (column B). Moreover, a label of their methylation status (TCGA data) is included (column C).

**Supplementary File 2. Methylation status of metabolism-related genes.**

Genes (official symbols; column A) are classified in multiple sheets according to the specific methylation cluster they belong to (based on expression and methylation concordance; see Methods) and are labeled according to their methylation status (TCGA data; column B).
