# Supplementary material for: Targeting metabolism by B-raf inhibitors and diclofenac restrains the viability of BRAF-mutated thyroid carcinomas with Hif-1α-mediated glycolytic phenotype
Source: Br J Cancer. 2023 May 17;129(2):249–65. doi: 10.1038/s41416-023-02282-2 (PMC10338540; doi:10.1038/s41416-023-02282-2)
Supplement: Supplementary file 2 — Supplementary File 1 [file 41416_2023_2282_MOESM2_ESM.xlsx]

## Sheet: Glucose,lactate,glutam carrier
Gene	Expression (BRAF- vs RAS-like)	Flag	Methylation status* (BRAF- vs RAS-like)
SLC1A5	up
SLC2A1	up
SLC2A3	up
SLC16A3	up		Hyper
SLC2A4	down		Hypo
SLC2A4RG	down
			*CpG island/shores/shelves

## Sheet: Glycolysis
Gene	Expression (BRAF- vs RAS-like)	Flag	Methylation status* (BRAF- vs RAS-like)
ENO2	down
ENO3	down	RASup
GCK	down	BRAFdown
HK1	down		Hypo
LDHB	down		Hypo
LDHD	down	BRAFdown
PDHA1	down
PFKFB1	down	BRAFdown
PFKFB2	down	BRAFdown
PFKM	down	BRAFdown	Hypo
ALDOC	up	RASdown
HK3	up	BRAFup
LDHA	up
PC	up	BRAFup	Hyper
PFKFB3	up	BRAFup	Hypo
PKM	up	BRAFup
			*CpG island/shores/shelves

## Sheet: TCA cycle
Gene	Expression (BRAF- vs RAS-like)	Flag	Methylation status* (BRAF- vs RAS-like)
ALDH4A1	down	BRAFdown	Hypo
GOT1	down	BRAFdown	Hypo
MDH2	down	RASup
OGDH	down	BRAFdown	Hyper
PDHA1	down
SUCLG1	down	BRAFdown	Hypo
DDO	up	BRAFup
GLS	up	BRAFup
GLS2	up	BRAFup
PC	up	BRAFup	Hyper
			*CpG island/shores/shelves

## Sheet: OXPHOS
Gene	Expression (BRAF- vs RAS-like)	Flag	Methylation status* (BRAF- vs RAS-like)
ATP4A	down	BRAFdown
ATP6V1B1	down
COX5B	down
COX6C	down
COX8A	down	BRAFdown	Hypo
CYC1	down
NDUFA2	down		Hypo
NDUFA4L2	down		Hyper
NDUFA8	down		Hyper
NDUFC2	down		Hypo
NDUFV3	down
UQCRQ	down
ATP12A	up	BRAFup
ATP6V0D2	up	BRAFup
TCIRG1	up	BRAFup
			*CpG island/shores/shelves

## Sheet: AA metabolism
Gene	Expression (BRAF- vs RAS-like)	Flag	Methylation status* (BRAF- vs RAS-like)
AACS	down		Hyper
AANAT	down		Hypo
ABAT	down	BRAFdown
ACAD8	down		Hypo
ACADS	down	BRAFdown	Hypo
ACAT1	down	BRAFdown	Hypo
ADH1B	down
AGMAT	down	BRAFdown
ALDH1B1	down
ALDH2	down	BRAFdown	Hypo
ALDH3A1	down
ALDH4A1	down	BRAFdown	Hypo
ALDH6A1	down	BRAFdown	Hypo
ALDH9A1	down		Hypo
ALDOB	down
AMDHD1	down		Hyper
AOC1	down
AOC2	down	BRAFdown
AOX1	down
ARG2	down
ASPA	down	BRAFdown
ASRGL1	down	RASup	Hyper
		BRAFdown	Hyper
BCAT2	down		Hypo
BCKDHB	down	BRAFdown
CKB	down	BRAFdown	Hypo
CTH	down		Hypo
CYP1A1	down		Hyper
CYP1A2	down	BRAFdown
DBH	down
DBT	down	BRAFdown	Hyper
DCT	down	BRAFdown
DMGDH	down	BRAFdown
DNMT3B	down	BRAFdown
EHHADH	down	BRAFdown
ENO2	down
ENO3	down	RASup
FTCD	down	BRAFdown
GAMT	down	RASup
GATM	down	BRAFdown
GCAT	down	BRAFdown
GLDC	down	BRAFdown
GNMT	down	BRAFdown
GOT1	down	BRAFdown	Hypo
GPT	down
HADHB	down		Hyper
HAAO	down
HGD	down	BRAFdown
HPD	down
HSD17B10	down
IDO2	down
IVD	down	BRAFdown	Hypo
LDHB	down		Hypo
LDHC	down
MAOA	down
MAOB	down	BRAFdown
MAT1A	down	BRAFdown
MAT2A	down
MCCC2	down	BRAFdown	Hypo
MDH2	down
NAGS	down
NOS1	down
NSD2	down
OXCT2	down	BRAFdown
PAH	down	BRAFdown
PLOD1	down
PRPS1	down
PSAT1	down	BRAFdown
PSPH	down	BRAFdown	Hypo
SAT2	down		Hypo
SETMAR	down	BRAFdown	Hypo
TDO2	down
TKT	down		Hypo
TPH1	down	RASup
TPO	down	BRAFdown	Hyper
KMT5A	down	BRAFdown
PFKM	down	BRAFdown	Hypo
ALDH1A3	up
ALDH3B1	up	BRAFup	Hyper
ALDH3B2	up		Hyper
ALDOC	up	RASdown
BBOX1	up
BCAT1	up	BRAFup
CDO1	up	RASdown	Hypo
		BRAFup	Hypo
CKM	up	BRAFup
CNDP1	up
CYP1B1	up	BRAFup	Hypo
DDO	up	BRAFup
GFPT2	up		Hyper
GLS	up	BRAFup
GLS2	up	BRAFup
IDO1	up
IL4I1	up	BRAFup	Hypo
INMT	up	BRAFup
KYNU	up
LDHA	up
ODC1	up	BRAFup
PC	up	BRAFup	Hyper
PKM	up	BRAFup
PRODH	up
PRPS2	up
TH	up	BRAFup
			*CpG island/shores/shelves

## Sheet: Lipid metabolism
Gene	Expression (BRAF- vs RAS-like)	Flag	Methylation status* (BRAF- vs RAS-like)
ACACB	down	BRAFdown
ACADS	down	BRAFdown	Hypo
ACAT1	down	BRAFdown	Hypo
ACHE	down	BRAFdown	Hyper
ACOX2	down	RASup
ACSL1	down	BRAFdown	Hyper
ACSL6	down
AGPAT4	down
AKR1C2	down
AKR1C3	down	BRAFdown
ALDH1B1	down
ALDH2	down	BRAFdown	Hypo
ALDH9A1	down
AMACR	down
BDH1	down	BRAFdown	Hypo
CHKA	down	BRAFdown	Hyper
CPT1A	down	BRAFdown
CYP17A1	down
CYP27B1	down	BRAFdown
DEGS2	down	RASup	Hyper
DGAT2	down	RASup	Hypo
DGKG	down	BRAFdown	Hyper
DGKI	down		Hypo
ECI1	down
EHHADH	down	BRAFdown
ELOVL2	down	RASup
FADS2	down
GPAM	down	RASup
		BRAFdown
GPD1	down
HADHB	down	RASup	Hyper
HSD11B2	down		Hypo
HSD17B4	down	BRAFdown	Hypo
JMJD7-PLA2G4B	down
LCLAT1	down		Hypo
LIPA	down		Hypo
LIPC	down
LIPG	down	BRAFdown	Hypo
LPL	down
NEU4	down	BRAFdown	Hyper
OXCT2	down	BRAFdown
PLA2G2A	down
PLA2G3	down	BRAFdown
PLA2G4B	down
PLA2G4F	down	BRAFdown
PLD1	down
PLPP1	down
PLPP3	down
SLC25A20	down	BRAFdown
SLC27A5	down
SQLE	down	BRAFdown
TM7SF2	down
UGT8	down	BRAFdown
ACOT7	up	BRAFup	Hyper
ACSL4	up
ACSL5	up	BRAFup
ADH1B	up
AKR1B10	up
ASAH2	up
CHPT1	up
CYP11A1	up	RASdown
CYP19A1	up
CYP21A2	up	BRAFup
DGKA	up
DGKH	up	BRAFup	Hyper
ETNK2	up	BRAFup
HSD11B1	up	RASdown
HSD3B7	up		Hypo
MSMO1	up	BRAFup
PLA2G2D	up
PLA2G2E	up	BRAFup
PLA2G4A	up	RASdown
PLPP2	up	BRAFup
SCD	up	BRAFup
SGMS1	up		Hypo
SGMS2	up		Hypo
SOAT2	up
SULT2B1	up	BRAFup
UGCG	up	BRAFup	Hypo
			*CpG island/shores/shelves

## Sheet: Purine metabolism
Gene	Expression (BRAF- vs RAS-like)	Flag	Methylation status* (BRAF- vs RAS-like)
ADCY1	down	BRAFdown	Hyper
ADCY2	down
ADCY5	down	BRAFdown
ADCY9	down	BRAFdown
AK7	down		Hypo
ENPP1	down		Hypo
ENPP3	down	RASup
FHIT	down	BRAFdown	Hypo
GUCY1A2	down
NME4	down
NPR1	down	BRAFdown	Hyper
NT5M	down		Hypo
PDE10A	down	BRAFdown
PDE11A	down	BRAFdown
PDE1B	down
PDE2A	down		Hyper
PDE4A	down		Hypo
PDE4B	down	BRAFdown	Hypo
PDE4D	down	BRAFdown
PDE7B	down	RASup
PDE8B	down	BRAFdown	Hypo
PRPS1	down
PRUNE1	down	BRAFdown
ADCY7	up	RASdown
ADCY8	up	BRAFup
AK4	up
AMPD1	up
ATIC	up	BRAFup
ENTPD2	up	BRAFup
ENTPD8	up	BRAFup
NT5E	up	BRAFup	Hypo
PAPSS1	up	BRAFup	Hyper
PDE1C	up
PDE3B	up	RASdown	Hypo
PDE4C	up
PDE5A	up	BRAFup
PDE6G	up
PDE9A	up	BRAFup	Hyper
PKM	up	BRAFup
PNP	up	BRAFup
PRPS2	up
RRM2	up		Hypo
XDH	up	BRAFup
			*CpG island/shores/shelves

## Sheet: Pyrimidine metabolism
Gene	Expression (BRAF- vs RAS-like)	Flag	Methylation status* (BRAF- vs RAS-like)
DPYS	down
ENPP1	down		Hypo
ENPP3	down	RASup
NME4	down
NT5M	down		Hypo
CMPK2	up		Hypo
ENTPD8	up	BRAFup
NT5E	up	BRAFup	Hypo
PNP	up	BRAFup
RRM2	up		Hypo
TYMP	up
UPP1	up	BRAFup	Hypo
UPP2	up	BRAFup
			*CpG island/shores/shelves

## Sheet: Validation_in_Costa_et_al_2015
Flagged genes validated in Costa et al., 2015 datasets
ABAT
ACACB
ACADS
ACAT1
ACOT7
ACOX2
ACSL5
ADCY1
ADCY7
ADCY9
AKR1C3
ALDH2
ALDH3B1
ALDH4A1
ALDH6A1
ASRGL1
ATIC
ATP4A
BCAT1
BDH1
CDO1
CKB
COX8A
CYP1B1
CYP27B1
DEGS2
DGAT2
DGKH
ELOVL2
ENO3
ENPP3
GATM
GLDC
GLS
GPAM
HGD
HK3
HSD17B4
IL4I1
INMT
IVD
KMT5A
LDHD
LIPG
MCCC2
MDH2
MSMO1
NPR1
NT5E
OGDH
OXCT2
PAPSS1
PDE5A
PDE7B
PDE9A
PFKFB2
PFKFB3
PFKM
PKM
PLA2G4A
PLA2G4F
PNP
PRUNE1
PSAT1
PSPH
SCD
SLC25A20
TCIRG1
TPO
UGCG
UGT8
UPP1
UPP2
