# Supplementary material for: Targeting metabolism by B-raf inhibitors and diclofenac restrains the viability of BRAF-mutated thyroid carcinomas with Hif-1α-mediated glycolytic phenotype
Source: Br J Cancer. 2023 May 17;129(2):249–65. doi: 10.1038/s41416-023-02282-2 (PMC10338540; doi:10.1038/s41416-023-02282-2)
Supplement: Supplementary file 3 — Supplementary File 2 [file 41416_2023_2282_MOESM3_ESM.xlsx]

## Sheet: Differentially methylated
Gene	Methylation status
ACOT7	Hyper
ALDH3B1	Hyper
ALDH3B2	Hyper
CD38	Hyper
DGKH	Hyper
DHDH	Hyper
DHRS3	Hyper
FUT2	Hyper
GFPT2	Hyper
HS3ST1	Hyper
MGAT4B	Hyper
PAFAH1B3	Hyper
PAPSS1	Hyper
PC	Hyper
PDE9A	Hyper
PIK3CD	Hyper
PIK3CG	Hyper
PLCD3	Hyper
SLC16A3	Hyper
SLC1A7	Hyper
AACS	Hyper
ABO	Hyper
ACHE	Hyper
ACSL1	Hyper
ADCY9	Hyper
AMDHD1	Hyper
ASRGL1	Hyper
CHKA	Hyper
CYP1A1	Hyper
DBT	Hyper
DEGS2	Hyper
DGKG	Hyper
GALNT9	Hyper
HADHB	Hyper
HS6ST3	Hyper
INPP5A	Hyper
MGAT5B	Hyper
MVD	Hyper
NDUFA4L2	Hyper
NDUFA8	Hyper
NEU4	Hyper
NPR1	Hyper
OGDH	Hyper
OPLAH	Hyper
PDE2A	Hyper
QPRT	Hyper
SLC2A8	Hyper
TPO	Hyper
ALOX15	Hypo
ALOX5	Hypo
B3GNT5	Hypo
B3GNT6	Hypo
CDO1	Hypo
CHST1	Hypo
CHST2	Hypo
CMPK2	Hypo
CSGALNACT2	Hypo
CYP1B1	Hypo
CYP26A1	Hypo
FUT8	Hypo
GALNT6	Hypo
GALNT7	Hypo
GGCT	Hypo
GLCE	Hypo
HMOX1	Hypo
HPSE	Hypo
HSD3B7	Hypo
IL4I1	Hypo
INPP4A	Hypo
LIPA	Hypo
NT5E	Hypo
PDE3B	Hypo
PFKFB3	Hypo
PIK3CA	Hypo
PLCD1	Hypo
POLR2F	Hypo
RRM2	Hypo
SGMS1	Hypo
SGMS2	Hypo
SULT2B1	Hypo
TBXAS1	Hypo
UAP1	Hypo
UGCG	Hypo
UPP1	Hypo
WARS	Hypo
AANAT	Hypo
ACAD8	Hypo
ACADS	Hypo
ACAT1	Hypo
ADCY1	Hypo
AK7	Hypo
ALDH2	Hypo
ALDH4A1	Hypo
ALDH6A1	Hypo
ALDH9A1	Hypo
ALG14	Hypo
ATP5J	Hypo
BCAT2	Hypo
BDH1	Hypo
CKB	Hypo
COX8A	Hypo
CSGALNACT1	Hypo
CTH	Hypo
CYP26B1	Hypo
CYP46A1	Hypo
DGAT2	Hypo
DGKI	Hypo
ENPP1	Hypo
EPHX1	Hypo
FHIT	Hypo
GALNT10	Hypo
GOT1	Hypo
HK1	Hypo
HSD11B2	Hypo
HSD17B4	Hypo
IVD	Hypo
JMJD7-PLA2G4B	Hypo
LCLAT1	Hypo
LDHB	Hypo
LIPG	Hypo
MCCC2	Hypo
NDUFA2	Hypo
NDUFC2	Hypo
NT5M	Hypo
PDE4A	Hypo
PDE4D	Hypo
PDE8B	Hypo
PFKM	Hypo
PLCE1	Hypo
POLR3B	Hypo
PSPH	Hypo
SAT2	Hypo
SEPHS2	Hypo
SETMAR	Hypo
SLC16A10	Hypo
SLC16A6	Hypo
SLC1A1	Hypo
SLC2A4	Hypo
SLC33A1	Hypo
SPR	Hypo
ST3GAL6	Hypo
SUCLG1	Hypo
TKT	Hypo
TPMT	Hypo

## Sheet: Cluster_1_hyper_down
AACS
ABO
ACHE
ACSL1
ADCY9
AMDHD1
ASRGL1
CHKA
CYP1A1
DBT
DEGS2
DGKG
GALNT9
HADHB
HS6ST3
INPP5A
MGAT5B
MVD
NDUFA4L2
NDUFA8
NEU4
NPR1
OGDH
OPLAH
PDE2A
QPRT
SLC2A8
TPO

## Sheet: Cluster_2_hyper_up
ACOT7
ALDH3B1
ALDH3B2
CD38
DGKH
DHDH
DHRS3
FUT2
GFPT2
HS3ST1
MGAT4B
PAFAH1B3
PAPSS1
PC
PDE9A
PIK3CD
PIK3CG
PLCD3
SLC16A3
SLC1A7

## Sheet: Cluster_3_hypo_up
ALOX15
ALOX5
B3GNT5
B3GNT6
CDO1
CHST1
CHST2
CMPK2
CSGALNACT2
CYP1B1
CYP26A1
FUT8
GALNT6
GALNT7
GGCT
GLCE
HMOX1
HPSE
HSD3B7
IL4I1
INPP4A
LIPA
NT5E
PDE3B
PFKFB3
PIK3CA
PLCD1
POLR2F
RRM2
SGMS1
SGMS2
SULT2B1
TBXAS1
UAP1
UGCG
UPP1
WARS

## Sheet: Cluster_4_hypo_down
AANAT
ACAD8
ACADS
ACAT1
ADCY1
AK7
ALDH2
ALDH4A1
ALDH6A1
ALDH9A1
ALG14
ATP5J
BCAT2
BDH1
CKB
COX8A
CSGALNACT1
CTH
CYP26B1
CYP46A1
DGAT2
DGKI
ENPP1
EPHX1
FHIT
GALNT10
GOT1
HK1
HSD11B2
HSD17B4
IVD
JMJD7-PLA2G4B
LCLAT1
LDHB
LIPG
MCCC2
NDUFA2
NDUFC2
NT5M
PDE4A
PDE4D
PDE8B
PFKM
PLCE1
POLR3B
PSPH
SAT2
SEPHS2
SETMAR
SLC16A10
SLC16A6
SLC1A1
SLC2A4
SLC33A1
SPR
ST3GAL6
SUCLG1
TKT
TPMT
